# Supplementary material for: Dietary intake and plasma levels of polyunsaturated fatty acids in early-stage Parkinson’s disease
Source: PubMed Central journal article supplement (PMC8203700; doi:10.1038/s41598-021-92029-x), 2021-06-14
Supplement: 41598_2021_92029_MOESM1_ESM.pdf [file 41598_2021_92029_MOESM1_ESM.pdf]

## **Dietary Intake and Plasma Levels of Polyunsaturated Fatty Acids in Early-Stage Parkinson's Disease**

**Dallah Yoo, MD<sup>1</sup>, Yunsook Lim, PhD<sup>2</sup>, Yiseul Son, BSc<sup>2</sup>, Hyunkyung Rho, MEd<sup>2</sup>, Chaewon Shin, MD, PhD<sup>3</sup>, Tae-Beom Ahn, MD, PhD<sup>1\*</sup>**

<sup>1</sup>Department of Neurology, Kyung Hee University Hospital, Kyung Hee University College of Medicine, Seoul, Republic of Korea

<sup>2</sup>Department of Food and Nutrition College of Human Ecology, Kyung Hee University, Seoul, Republic of Korea

<sup>3</sup>Department of Neurology, Chungnam National University Hospital, College of Medicine, Chungnam National University, Daejeon, Korea

### **Correspondence to:**

Tae-Beom Ahn, MD, PhD

Department of Neurology, Kyung Hee University Hospital

23, Kyungheedaero, Dongdaemun-gu, Seoul, Republic of Korea (02447)

Tel: +82-2-958-8448, Fax: +82-2-958-8490, E-mail address: [taebeom.ahn@khu.ac.kr](mailto:taebeom.ahn@khu.ac.kr)

**Supplementary Table S1. Plasma polyunsaturated fatty acid levels according to medication in Parkinson's disease**

| Plasma level (µg/mL) | Levodopa        |                 |                    | MAO-B inhibitor |                 |                    | Dopamine agonist |                 |                    | COMT inhibitor          |                         |                    | Amantadine      |                 |                    |
|----------------------|-----------------|-----------------|--------------------|-----------------|-----------------|--------------------|------------------|-----------------|--------------------|-------------------------|-------------------------|--------------------|-----------------|-----------------|--------------------|
|                      | Yes<br>n=28     | No<br>n=10      | p-value            | Yes<br>n=28     | No<br>n=10      | p-value            | Yes<br>n=26      | No<br>n=12      | p-value            | Yes<br>n=10             | No<br>n=28              | p-value            | Yes<br>n=18     | No<br>n=20      | p-value            |
| <b>ALA</b>           | 21.1<br>(9.7)   | 23.8<br>(11.9)  | 0.491              | 21.4<br>(10.3)  | 23.0<br>(10.6)  | 0.690              | 21.9<br>(10.1)   | 21.8<br>(11.0)  | 0.985              | 18.3<br>(10.1)          | 23.1<br>(10.2)          | 0.286 <sup>a</sup> | 20.7<br>(9.8)   | 22.9<br>(10.8)  | 0.522              |
| <b>EPA</b>           | 16.8<br>(7.7)   | 14.1<br>(6.0)   | 0.328              | 15.1<br>(7.0)   | 19.0<br>(7.7)   | 0.141              | 16.4<br>(7.4)    | 15.5<br>(7.4)   | 0.841 <sup>a</sup> | 15.1<br>(7.0)           | 16.5<br>(7.5)           | 0.604              | 16.2<br>(7.1)   | 16.0<br>(7.7)   | 0.951              |
| <b>DHA</b>           | 14.8<br>(6.1)   | 13.1<br>(6.5)   | 0.465              | 14.0<br>(6.2)   | 15.3<br>(6.2)   | 0.584              | 14.6<br>(6.7)    | 13.8<br>(5.0)   | 0.724              | 16.0<br>(7.4)           | 13.8<br>(5.6)           | 0.321              | 14.0<br>(6.9)   | 14.6<br>(5.5)   | 0.443 <sup>a</sup> |
| <b>LA</b>            | 246.6<br>(67.5) | 275.1<br>(77.5) | 0.277              | 259.6<br>(76.1) | 238.7<br>(51.4) | 0.427              | 261.9<br>(78.9)  | 237.1<br>(45.4) | 0.319              | <b>211.8<br/>(50.4)</b> | <b>269.2<br/>(71.0)</b> | <b>0.025</b>       | 247.5<br>(74.3) | 260.0<br>(96.1) | 0.593              |
| <b>AA</b>            | 38.2<br>(14.0)  | 34.9<br>(7.2)   | 0.757 <sup>a</sup> | 38.8<br>(13.8)  | 33.2<br>(7.3)   | 0.442 <sup>a</sup> | 38.6<br>(13.2)   | 34.6<br>(11.1)  | 0.312 <sup>a</sup> | 38.9<br>(17.8)          | 36.8<br>(10.5)          | 0.568 <sup>a</sup> | 37.9<br>(15.8)  | 36.9<br>(9.2)   | 0.828 <sup>a</sup> |

Data are described as mean (standard deviation); The *p*-values marked in bold indicate significant differences between groups.

For group comparisons, Student's *t*-test was used if not otherwise indicated; <sup>a</sup>Mann-Whitney *U* test

**Abbreviations:** PUFAs, polyunsaturated fatty acids; MAO-B, monoamine oxidase-B; COMT, catechol-O-methyltransferase; ALA, alpha-linolenic acid; EPA, eicosapentaenoic acid; DHA, docosahexaenoic acid; LA, linoleic acid; AA, arachidonic acid

**Supplementary Table S2. Association between the Unified Parkinson's Disease Rating Scale item scores and plasma polyunsaturated fatty acid levels in Parkinson's disease**

| Age-adjusted    | Items                                   | Plasma concentrations (µg/mL) |              |        |       |              |              |               |              |              |              |                            |              |
|-----------------|-----------------------------------------|-------------------------------|--------------|--------|-------|--------------|--------------|---------------|--------------|--------------|--------------|----------------------------|--------------|
|                 |                                         | ALA                           |              | EPA    |       | DHA          |              | LA            |              | AA           |              | ω-6/ω-3 ratio <sup>a</sup> |              |
|                 |                                         | ρ                             | p            | ρ      | p     | ρ            | p            | ρ             | p            | ρ            | p            | ρ                          | p            |
| <b>UPDRS I</b>  | <b>Intellectual impairment</b>          | 0.069                         | 0.687        | 0.207  | 0.220 | <b>0.355</b> | <b>0.031</b> | -0.203        | 0.229        | <b>0.362</b> | <b>0.028</b> | -0.358                     | 0.029        |
|                 | Thought disorder                        | -0.056                        | 0.742        | 0.198  | 0.241 | 0.258        | 0.123        | -0.199        | 0.236        | 0.087        | 0.609        | -0.231                     | 0.170        |
|                 | <b>Depression</b>                       | <b>-0.351</b>                 | <b>0.033</b> | -0.185 | 0.272 | -0.062       | 0.716        | <b>-0.424</b> | <b>0.009</b> | -0.184       | 0.275        | -0.025                     | 0.886        |
|                 | <b>Motivation/initiative</b>            | -0.198                        | 0.240        | -0.101 | 0.551 | -0.033       | 0.844        | -0.140        | 0.407        | <b>0.332</b> | <b>0.044</b> | -0.059                     | 0.731        |
| <b>UPDRS II</b> | Speech                                  | 0.093                         | 0.585        | -0.134 | 0.429 | -0.154       | 0.363        | 0.117         | 0.491        | 0.003        | 0.987        | 0.015                      | 0.929        |
|                 | <b>Salivation</b>                       | 0.055                         | 0.745        | 0.142  | 0.403 | 0.297        | 0.075        | -0.216        | 0.198        | <b>0.442</b> | <b>0.006</b> | -0.318                     | 0.055        |
|                 | <b>Swallowing</b>                       | -0.111                        | 0.513        | -0.086 | 0.615 | 0.267        | 0.110        | <b>-0.414</b> | <b>0.011</b> | 0.298        | 0.073        | -0.272                     | 0.103        |
|                 | <b>Handwriting</b>                      | 0.094                         | 0.581        | 0.278  | 0.095 | 0.209        | 0.214        | -0.049        | 0.771        | 0.262        | 0.118        | <b>-0.330</b>              | <b>0.046</b> |
|                 | Cutting food and handling utensils      | -0.101                        | 0.553        | 0.095  | 0.576 | 0.084        | 0.623        | -0.144        | 0.396        | -0.061       | 0.722        | 0.008                      | 0.965        |
|                 | Dressing                                | 0.138                         | 0.415        | -0.015 | 0.928 | -0.184       | 0.276        | 0.134         | 0.429        | 0.047        | 0.782        | 0.121                      | 0.475        |
|                 | Hygiene                                 | -0.052                        | 0.760        | 0.187  | 0.268 | 0.052        | 0.758        | -0.118        | 0.488        | 0.127        | 0.455        | -0.134                     | 0.428        |
|                 | Turning in bed and adjusting bed cloths | -0.242                        | 0.148        | -0.262 | 0.117 | -0.216       | 0.199        | -0.089        | 0.600        | 0.005        | 0.976        | 0.140                      | 0.410        |

|                  |                                            |               |              |        |       |        |       |               |              |               |              |        |       |
|------------------|--------------------------------------------|---------------|--------------|--------|-------|--------|-------|---------------|--------------|---------------|--------------|--------|-------|
|                  | Falling (unrelated to freezing)            | 0.126         | 0.458        | 0.264  | 0.115 | 0.186  | 0.271 | -0.052        | 0.762        | 0.064         | 0.708        | -0.270 | 0.106 |
|                  | Freezing when walking                      | 0.143         | 0.400        | 0.190  | 0.260 | 0.178  | 0.293 | 0.004         | 0.981        | 0.030         | 0.859        | -0.246 | 0.141 |
|                  | Walking                                    | -0.186        | 0.271        | -0.156 | 0.356 | -0.080 | 0.639 | -0.306        | 0.066        | -0.060        | 0.726        | 0.037  | 0.827 |
|                  | Tremor                                     | -0.143        | 0.397        | 0.166  | 0.325 | 0.072  | 0.672 | -0.184        | 0.276        | -0.068        | 0.691        | -0.081 | 0.632 |
|                  | Sensory complaints related to parkinsonism | 0.040         | 0.815        | 0.171  | 0.311 | 0.173  | 0.307 | 0.046         | 0.786        | 0.023         | 0.890        | -0.111 | 0.514 |
| <b>UPDRS III</b> | Speech                                     | 0.014         | 0.936        | 0.196  | 0.246 | 0.127  | 0.453 | -0.317        | 0.056        | 0.029         | 0.863        | -0.281 | 0.092 |
|                  | Facial expression                          | -0.027        | 0.872        | -0.202 | 0.230 | -0.039 | 0.818 | -0.103        | 0.543        | -0.177        | 0.295        | 0.073  | 0.669 |
|                  | Tremor at rest                             | 0.059         | 0.728        | -0.050 | 0.769 | 0.056  | 0.744 | -0.129        | 0.447        | 0.143         | 0.399        | -0.199 | 0.238 |
|                  | Action or postural tremor of hands         | -0.196        | 0.244        | -0.005 | 0.975 | -0.155 | 0.360 | -0.267        | 0.110        | -0.165        | 0.328        | 0.022  | 0.898 |
|                  | <b>Rigidity</b>                            | <b>-0.331</b> | <b>0.046</b> | -0.249 | 0.137 | -0.070 | 0.679 | <b>-0.380</b> | <b>0.020</b> | -0.202        | 0.231        | 0.005  | 0.979 |
|                  | <b>Finger taps</b>                         | -0.179        | 0.289        | -0.292 | 0.080 | -0.237 | 0.158 | -0.134        | 0.431        | <b>-0.362</b> | <b>0.028</b> | 0.094  | 0.580 |
|                  | Hand movements                             | -0.232        | 0.167        | -0.147 | 0.386 | 0.001  | 0.994 | -0.096        | 0.570        | -0.042        | 0.804        | 0.040  | 0.814 |
|                  | Rapid alternating movements of hands       | -0.084        | 0.620        | 0.009  | 0.957 | 0.055  | 0.748 | -0.149        | 0.379        | -0.301        | 0.070        | -0.123 | 0.469 |
|                  | Leg agility                                | -0.133        | 0.432        | 0.053  | 0.753 | 0.203  | 0.227 | -0.158        | 0.350        | 0.277         | 0.097        | -0.147 | 0.387 |
|                  | <b>Arising from chair</b>                  | <b>-0.352</b> | <b>0.033</b> | -0.216 | 0.200 | -0.031 | 0.855 | <b>-0.421</b> | <b>0.010</b> | -0.061        | 0.719        | 0.090  | 0.595 |
|                  | Posture                                    | -0.038        | 0.823        | 0.112  | 0.511 | 0.028  | 0.868 | -0.191        | 0.258        | 0.110         | 0.515        | -0.200 | 0.236 |
|                  | <b>Gait</b>                                | -0.190        | 0.261        | -0.169 | 0.318 | -0.041 | 0.808 | <b>-0.417</b> | <b>0.010</b> | -0.073        | 0.667        | 0.031  | 0.854 |

|                     |                                         |                                            |                       |                          |                       |                          |                       |                          |                       |                          |                       |                                                                      |                       |
|---------------------|-----------------------------------------|--------------------------------------------|-----------------------|--------------------------|-----------------------|--------------------------|-----------------------|--------------------------|-----------------------|--------------------------|-----------------------|----------------------------------------------------------------------|-----------------------|
|                     | Postural stability                      | -0.086                                     | 0.612                 | 0.064                    | 0.705                 | 0.049                    | 0.773                 | -0.237                   | 0.159                 | 0.011                    | 0.948                 | -0.076                                                               | 0.655                 |
|                     | Body bradykinesia and hypokinesia       | -0.230                                     | 0.171                 | -0.030                   | 0.860                 | 0.019                    | 0.910                 | -0.156                   | 0.357                 | -0.109                   | 0.522                 | 0.044                                                                | 0.794                 |
|                     |                                         | Plasma concentrations ( $\mu\text{g/mL}$ ) |                       |                          |                       |                          |                       |                          |                       |                          |                       |                                                                      |                       |
| <b>Sex-adjusted</b> |                                         | <b>ALA</b>                                 |                       | <b>EPA</b>               |                       | <b>DHA</b>               |                       | <b>LA</b>                |                       | <b>AA</b>                |                       | <b><math>\omega</math>-6/<math>\omega</math>-3 ratio<sup>a</sup></b> |                       |
|                     | <b>Items</b>                            | <b><math>\rho</math></b>                   | <b><math>p</math></b> | <b><math>\rho</math></b> | <b><math>p</math></b> | <b><math>\rho</math></b> | <b><math>p</math></b> | <b><math>\rho</math></b> | <b><math>p</math></b> | <b><math>\rho</math></b> | <b><math>p</math></b> | <b><math>\rho</math></b>                                             | <b><math>p</math></b> |
| <b>UPDRS I</b>      | <b>Intellectual impairment</b>          | 0.101                                      | 0.552                 | 0.221                    | 0.189                 | <b>0.441</b>             | <b>0.006</b>          | -0.147                   | 0.386                 | <b>0.481</b>             | <b>0.003</b>          | <b>-0.351</b>                                                        | <b>0.033</b>          |
|                     | Thought disorder                        | -0.044                                     | 0.794                 | 0.209                    | 0.215                 | 0.263                    | 0.116                 | -0.194                   | 0.251                 | 0.089                    | 0.601                 | -0.244                                                               | 0.145                 |
|                     | <b>Depression</b>                       | <b>-0.349</b>                              | <b>0.034</b>          | -0.176                   | 0.299                 | -0.066                   | 0.699                 | <b>-0.424</b>            | <b>0.009</b>          | -0.178                   | 0.293                 | -0.048                                                               | 0.777                 |
|                     | <b>Motivation/initiative</b>            | -0.178                                     | 0.291                 | -0.086                   | 0.611                 | 0.019                    | 0.910                 | -0.114                   | 0.502                 | <b>0.376</b>             | <b>0.022</b>          | -0.071                                                               | 0.675                 |
| <b>UPDRS II</b>     | Speech                                  | 0.220                                      | 0.192                 | -0.083                   | 0.627                 | -0.128                   | 0.449                 | 0.127                    | 0.455                 | 0.019                    | 0.912                 | -0.073                                                               | 0.670                 |
|                     | <b>Salivation</b>                       | -0.185                                     | 0.272                 | 0.025                    | 0.883                 | <b>0.325</b>             | <b>0.049</b>          | -0.185                   | 0.274                 | <b>0.515</b>             | <b>0.001</b>          | -0.113                                                               | 0.507                 |
|                     | <b>Swallowing</b>                       | -0.192                                     | 0.254                 | -0.122                   | 0.473                 | 0.314                    | 0.058                 | <b>-0.358</b>            | <b>0.030</b>          | <b>0.384</b>             | <b>0.019</b>          | -0.183                                                               | 0.279                 |
|                     | <b>Handwriting</b>                      | 0.031                                      | 0.854                 | 0.240                    | 0.152                 | 0.266                    | 0.112                 | -0.007                   | 0.967                 | <b>0.361</b>             | <b>0.028</b>          | -0.247                                                               | 0.141                 |
|                     | Cutting food and handling utensils      | -0.023                                     | 0.891                 | 0.141                    | 0.407                 | 0.105                    | 0.538                 | -0.138                   | 0.414                 | -0.039                   | 0.818                 | -0.057                                                               | 0.739                 |
|                     | Dressing                                | 0.070                                      | 0.679                 | -0.055                   | 0.745                 | -0.285                   | 0.087                 | 0.086                    | 0.614                 | -0.119                   | 0.481                 | 0.159                                                                | 0.346                 |
|                     | Hygiene                                 | -0.066                                     | 0.699                 | 0.184                    | 0.275                 | 0.078                    | 0.645                 | -0.101                   | 0.551                 | 0.162                    | 0.338                 | -0.119                                                               | 0.484                 |
|                     | Turning in bed and adjusting bed cloths | -0.225                                     | 0.180                 | -0.250                   | 0.136                 | -0.153                   | 0.365                 | -0.059                   | 0.728                 | 0.101                    | 0.552                 | 0.132                                                                | 0.436                 |

|                  |                                            |               |              |        |       |        |       |               |              |               |              |        |       |
|------------------|--------------------------------------------|---------------|--------------|--------|-------|--------|-------|---------------|--------------|---------------|--------------|--------|-------|
|                  | Falling (unrelated to freezing)            | 0.057         | 0.739        | 0.234  | 0.163 | 0.106  | 0.531 | -0.090        | 0.597        | -0.065        | 0.704        | -0.239 | 0.155 |
|                  | Freezing when walking                      | -0.044        | 0.797        | 0.112  | 0.509 | 0.103  | 0.542 | -0.032        | 0.850        | -0.078        | 0.646        | -0.133 | 0.432 |
|                  | Walking                                    | -0.153        | 0.366        | -0.137 | 0.419 | -0.066 | 0.698 | -0.301        | 0.071        | -0.042        | 0.803        | 0.004  | 0.983 |
|                  | Tremor                                     | -0.136        | 0.423        | 0.174  | 0.302 | 0.017  | 0.918 | -0.208        | 0.217        | -0.156        | 0.356        | -0.110 | 0.515 |
|                  | Sensory complaints related to parkinsonism | 0.008         | 0.961        | 0.158  | 0.350 | 0.153  | 0.365 | 0.039         | 0.818        | 0.000         | 0.999        | -0.090 | 0.597 |
| <b>UPDRS III</b> | <b>Speech</b>                              | -0.116        | 0.493        | 0.144  | 0.397 | 0.080  | 0.637 | <b>-0.348</b> | <b>0.035</b> | -0.028        | 0.870        | -0.206 | 0.221 |
|                  | Facial expression                          | 0.074         | 0.662        | -0.158 | 0.349 | -0.027 | 0.873 | -0.104        | 0.541        | -0.164        | 0.331        | -0.007 | 0.967 |
|                  | Tremor at rest                             | 0.034         | 0.842        | -0.065 | 0.702 | 0.061  | 0.721 | -0.123        | 0.470        | 0.144         | 0.394        | -0.176 | 0.298 |
|                  | Action or postural tremor of hands         | -0.123        | 0.469        | 0.037  | 0.827 | -0.168 | 0.322 | -0.278        | 0.096        | -0.197        | 0.243        | -0.054 | 0.749 |
|                  | <b>Rigidity</b>                            | -0.278        | 0.096        | -0.218 | 0.194 | 0.002  | 0.993 | <b>-0.352</b> | <b>0.033</b> | -0.074        | 0.662        | -0.042 | 0.804 |
|                  | <b>Finger taps</b>                         | -0.141        | 0.404        | -0.272 | 0.104 | -0.248 | 0.140 | -0.143        | 0.398        | <b>-0.358</b> | <b>0.030</b> | 0.049  | 0.772 |
|                  | Hand movements                             | -0.113        | 0.507        | -0.085 | 0.617 | 0.112  | 0.510 | -0.053        | 0.753        | 0.117         | 0.492        | -0.049 | 0.772 |
|                  | Rapid alternating movements of hands       | -0.050        | 0.770        | 0.030  | 0.862 | 0.099  | 0.562 | -0.127        | 0.454        | -0.195        | 0.246        | -0.145 | 0.391 |
|                  | Leg agility                                | -0.161        | 0.342        | 0.045  | 0.790 | 0.177  | 0.295 | -0.168        | 0.321        | 0.207         | 0.218        | -0.141 | 0.405 |
|                  | <b>Arising from chair</b>                  | <b>-0.389</b> | <b>0.017</b> | -0.225 | 0.180 | -0.006 | 0.972 | <b>-0.401</b> | <b>0.014</b> | -0.006        | 0.974        | 0.110  | 0.515 |
|                  | Posture                                    | -0.069        | 0.685        | 0.097  | 0.567 | 0.081  | 0.635 | -0.156        | 0.357        | 0.199         | 0.238        | -0.159 | 0.349 |
|                  | <b>Gait</b>                                | -0.252        | 0.132        | -0.196 | 0.244 | -0.066 | 0.697 | <b>-0.427</b> | <b>0.008</b> | -0.097        | 0.567        | 0.063  | 0.709 |

|                                         |        |       |       |       |        |       |        |       |        |       |        |       |
|-----------------------------------------|--------|-------|-------|-------|--------|-------|--------|-------|--------|-------|--------|-------|
| Postural stability                      | -0.151 | 0.373 | 0.038 | 0.825 | -0.031 | 0.857 | -0.275 | 0.100 | -0.117 | 0.491 | -0.055 | 0.747 |
| Body<br>bradykinesia and<br>hypokinesia | -0.151 | 0.372 | 0.009 | 0.957 | -0.079 | 0.643 | -0.198 | 0.240 | -0.282 | 0.091 | -0.052 | 0.761 |

The  $p$ -values marked in bold indicate statistical significance.

$\rho$ : Spearman's rank correlation coefficient after adjusted for age or sex.

<sup>a</sup> $\omega$ -6/ $\omega$ -3 ratio = (LA+AA)/(ALA+EPA+DHA)

**Abbreviations:** UPDRS, Unified Parkinson's Disease Rating Scale; PUFAs, polyunsaturated fatty acids; ALA, alpha-linolenic acid; EPA, eicosapentaenoic acid; DHA, docosahexaenoic acid; LA, linoleic acid; AA, arachidonic acid
